# Supplementary material
Source: Elsevier journal article supplement (https://www.sciencedirect.com/science/article/pii/S225488742200073X)

**Supplementary figure 1.** Specific rates for admissions WITH and DUE TO COPD according to age group. Period from 1996 to 2018. Total (men and women) .

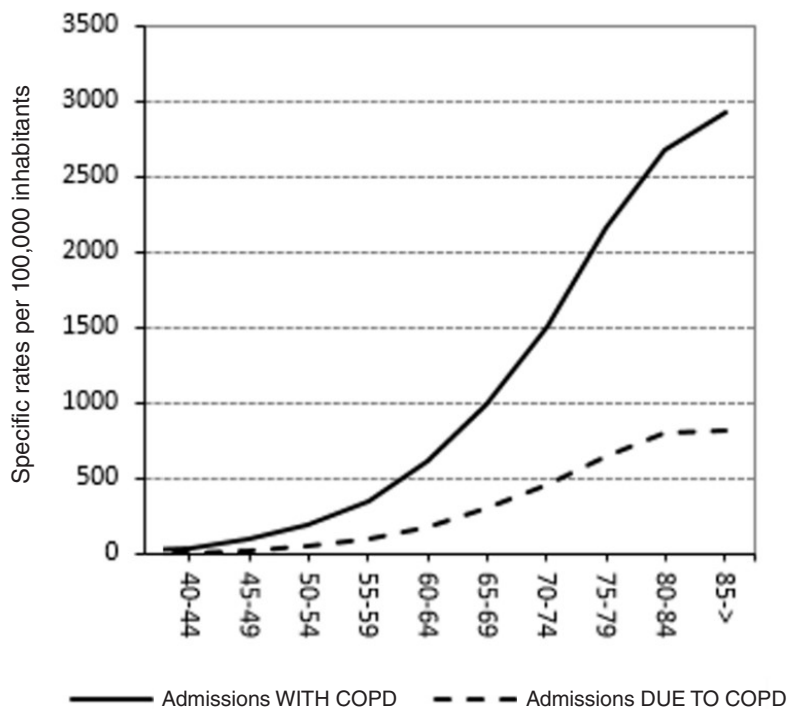

**Supplementary figure 2.** Percentage of admissions WITH, DUE TO, and WITH but not DUE TO COPD according to month of admission. Period from 1996 to 2018.

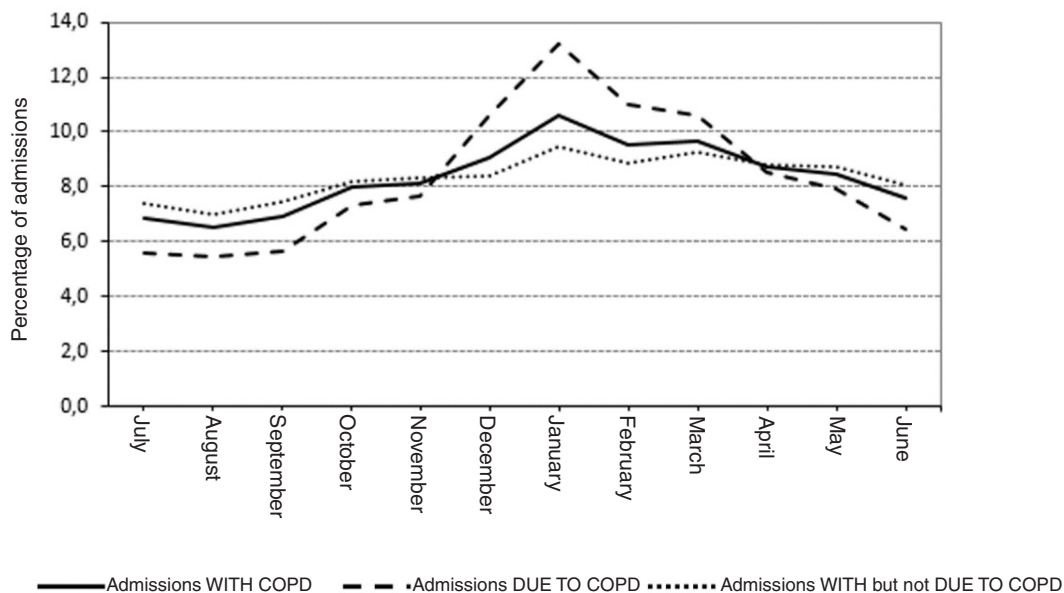

Supplement: mmc1 [file S225488742200073X:mmc1.pdf]
